# Supplementary material for: The effect of fluorine substituents on the crystal structure and spin crossover behavior of the cation [MnIII(3,5-diHal-sal2323)]+ complex family with BPh4 anions
Source: Royal Society of Chemistry journal article supplement (doi:10.1039/d2nj02872g), 2022-01-01
Supplement: d2nj02872g1.pdf [file d2nj02872g1.pdf]

## ELECTRONIC SUPPORTING INFORMATION (ESI) for New Journal Chemistry

This journal is © The Royal Society of Chemistry and the Centre National de la Recherche Scientifique  
2022

### Effect of fluorine substituents on crystal structure and spin crossover behavior of cation $[\text{Mn}^{\text{III}}(\text{3,5-diHal-}$ $\text{sal}_2\text{323})]^+$ complexes family with $\text{BPh}_4$ anion

A.V. Tiunova,<sup>a,b</sup> A.V. Kazakova,<sup>b\*</sup> D.V. Korchagin,<sup>b\*</sup> G.V. Shilov,<sup>b</sup> K.V. Zakharov,<sup>a</sup> A.N. Vasiliev,<sup>a,c</sup> and  
E.B. Yagubskii<sup>b\*</sup>

<sup>a</sup>*Lomonosov Moscow State University, 119991 Moscow, Russia*

<sup>b</sup>*Institute of Problems of Chemical Physics RAS, 142432 Chernogolovka, MD, Russia, E-mail: [kazakova@icp.ac.ru](mailto:kazakova@icp.ac.ru),  
[korden@icp.ac.ru](mailto:korden@icp.ac.ru), [yagubski@gmail.com](mailto:yagubski@gmail.com)*

<sup>c</sup>*National University of Science and Technology "MISIS", 119049 Moscow, Russia*

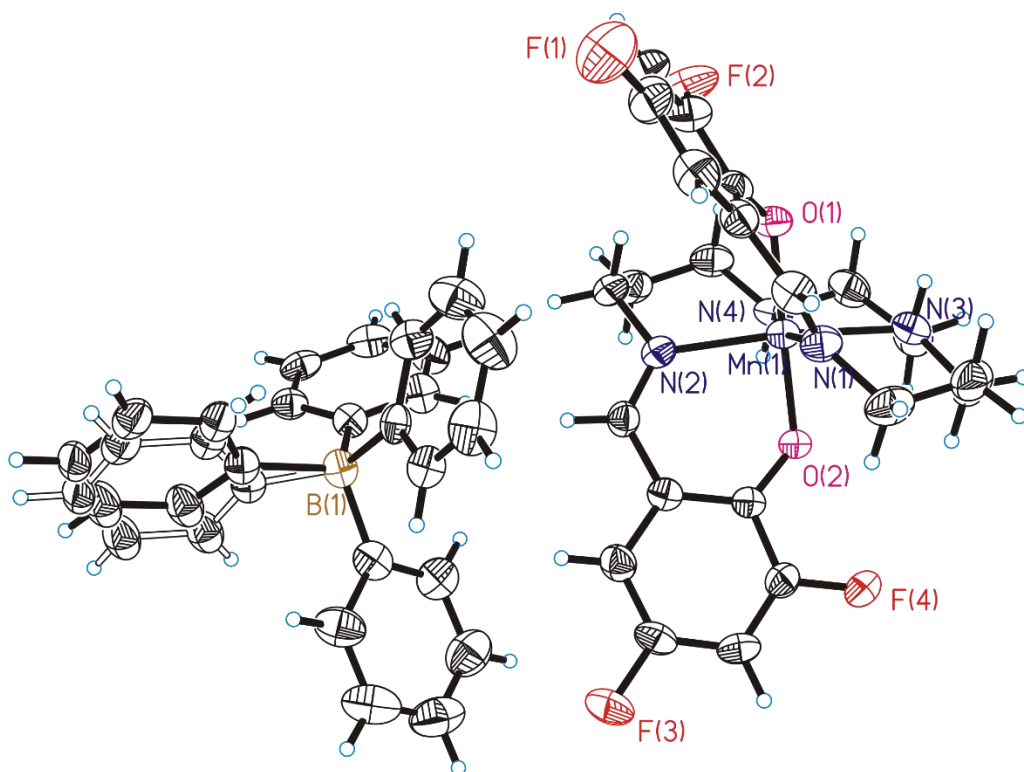

1\_240K

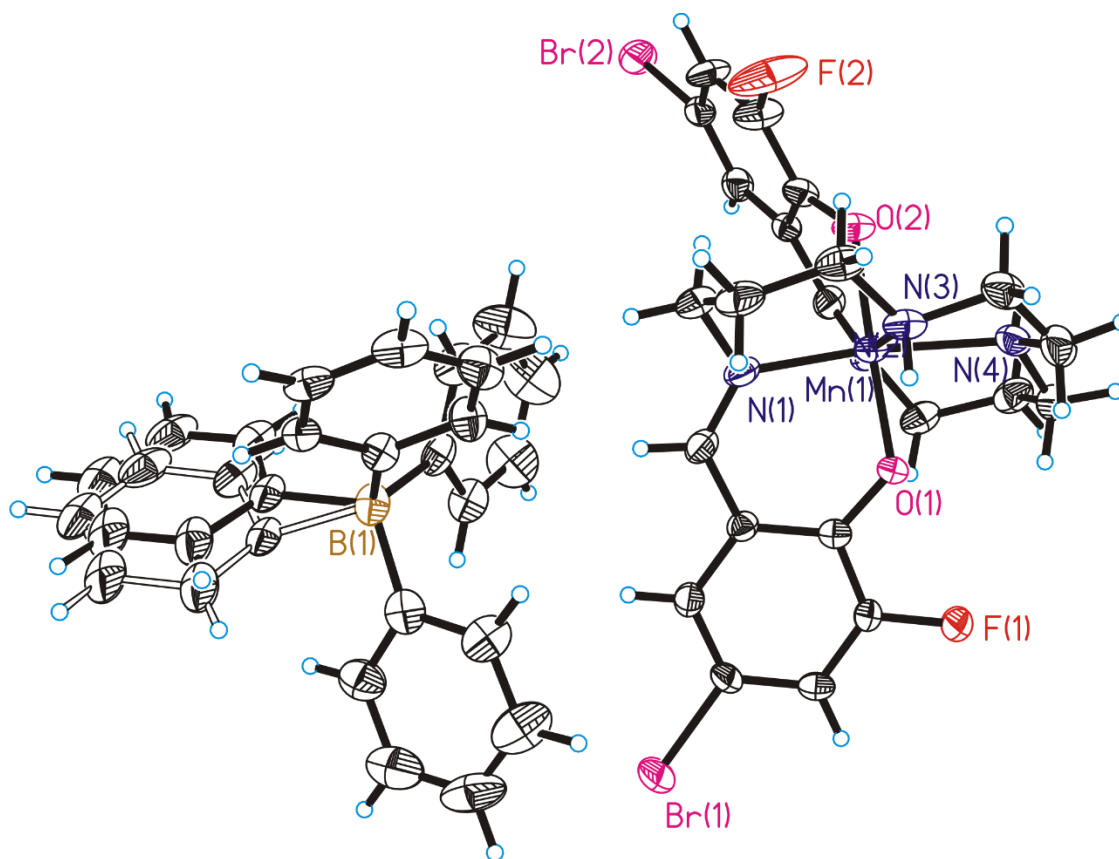

2\_160K

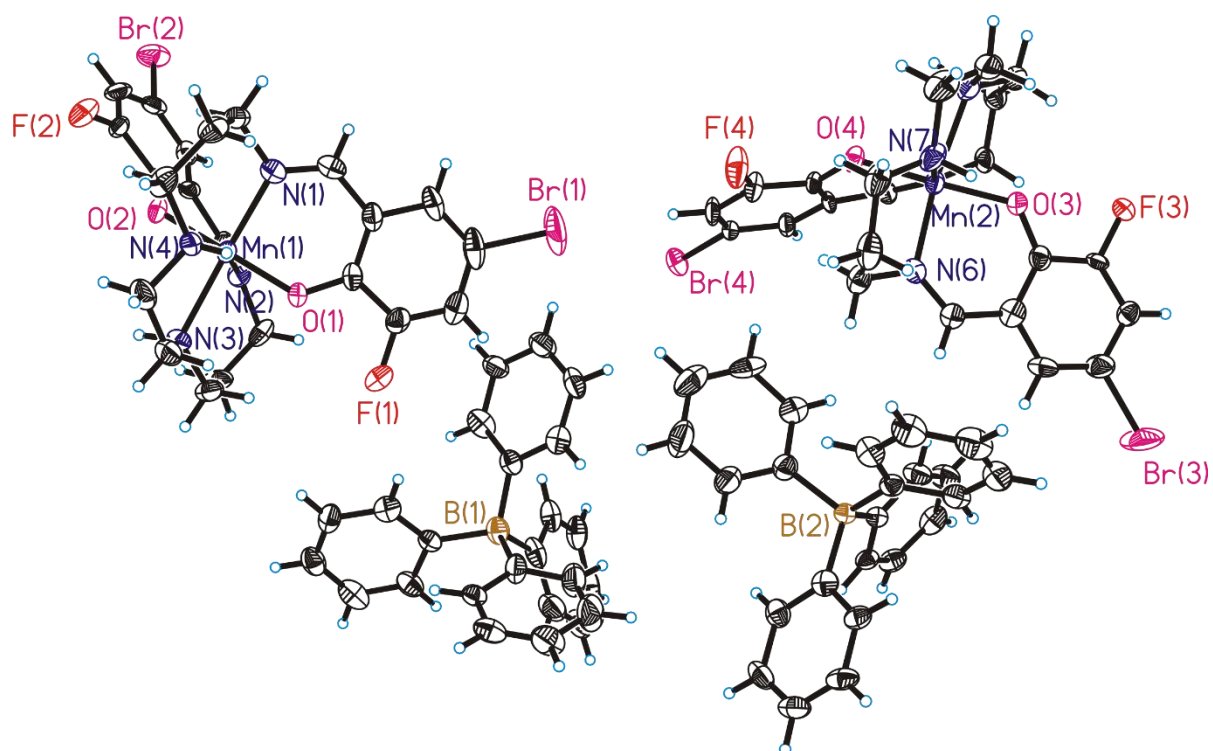

3\_160K

**Figure S1.** Asymmetric units of complexes **1-3** (50% ellipsoid probability). Minor positions of the disordered phenyl groups of the BPh<sub>4</sub> anions in **1** and **2** are shown by empty bonds.

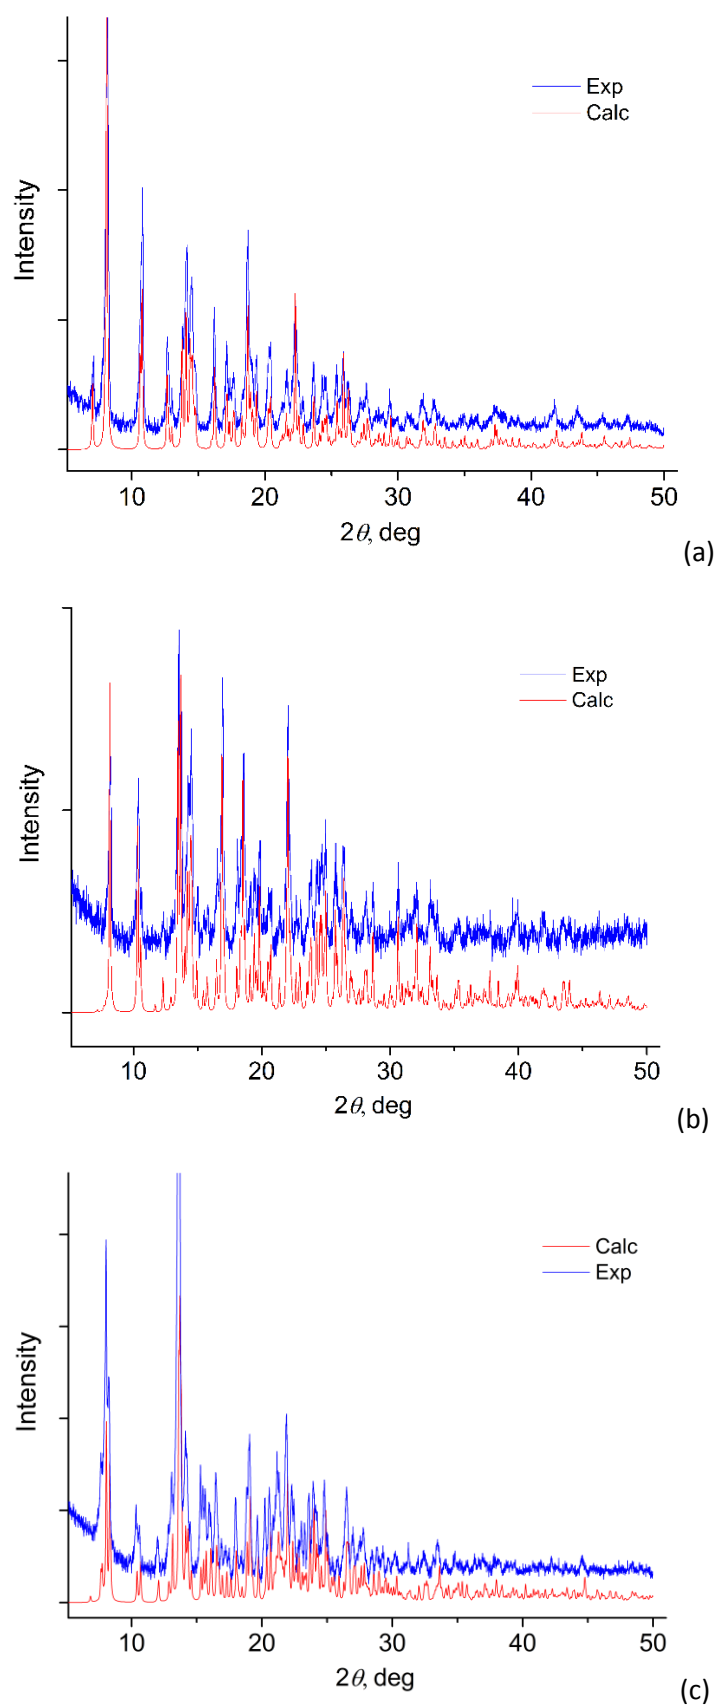

**Figure S2.** Powder X-ray diffraction pattern of polycrystalline samples of **1** (a), **2** (b) and **3** (c): experimental (blue), and calculated from single crystal data (red).

**Table S1.** Crystal data and structure refinement parameters for compounds **1-3**.

|                                                                                            |                                                                                                                                                               |                |                |                                                                                                                                                                               |                |                |                                                                                                                                                                                  |                |                |
|--------------------------------------------------------------------------------------------|---------------------------------------------------------------------------------------------------------------------------------------------------------------|----------------|----------------|-------------------------------------------------------------------------------------------------------------------------------------------------------------------------------|----------------|----------------|----------------------------------------------------------------------------------------------------------------------------------------------------------------------------------|----------------|----------------|
| Temperature, K                                                                             | 100                                                                                                                                                           | 160            | 240            | 100                                                                                                                                                                           | 160            | 240            | 100                                                                                                                                                                              | 160            | 240            |
| Empirical formula                                                                          | [C <sub>22</sub> H <sub>24</sub> F <sub>4</sub> N <sub>4</sub> O <sub>2</sub> Mn] <sup>+</sup> [(C <sub>6</sub> H <sub>5</sub> ) <sub>4</sub> B] <sup>-</sup> |                |                | [C <sub>22</sub> H <sub>24</sub> F <sub>2</sub> Br <sub>2</sub> N <sub>4</sub> O <sub>2</sub> Mn] <sup>+</sup> [(C <sub>6</sub> H <sub>5</sub> ) <sub>4</sub> B] <sup>-</sup> |                |                | 2[C <sub>22</sub> H <sub>24</sub> Br <sub>2</sub> Cl <sub>2</sub> N <sub>4</sub> O <sub>2</sub> Mn] <sup>+</sup> 2[(C <sub>6</sub> H <sub>5</sub> ) <sub>4</sub> B] <sup>-</sup> |                |                |
| Molecular weight                                                                           | 826.60                                                                                                                                                        |                |                | 948.42                                                                                                                                                                        |                |                | 1896.84                                                                                                                                                                          |                |                |
| Crystal system, space group                                                                | monoclinic, <i>P2<sub>1</sub>/c</i>                                                                                                                           |                |                | monoclinic, <i>P2<sub>1</sub>/n</i>                                                                                                                                           |                |                | triclinic, <i>P1</i>                                                                                                                                                             |                |                |
| <i>a</i> , Å                                                                               | 14.2148(6)                                                                                                                                                    | 14.2739(7)     | 14.3158(5)     | 14.2242(5)                                                                                                                                                                    | 14.2815(6)     | 14.3588(9)     | 13.0486(7)                                                                                                                                                                       | 13.0849(7)     | 13.1318(9)     |
| <i>b</i> , Å                                                                               | 21.5308(6)                                                                                                                                                    | 21.7237(6)     | 21.8648(6)     | 22.6477(7)                                                                                                                                                                    | 22.824(1)      | 22.9189(12)    | 13.4558(9)                                                                                                                                                                       | 13.4898(9)     | 13.500(1)      |
| <i>c</i> , Å                                                                               | 14.5452(6)                                                                                                                                                    | 14.5807(6)     | 14.6437(6)     | 14.5139(6)                                                                                                                                                                    | 14.4290(8)     | 14.4698(9)     | 14.2222(9)                                                                                                                                                                       | 14.2694(6)     | 14.320(1)      |
| $\alpha$ , °                                                                               | 90                                                                                                                                                            | 90             | 90             | 90                                                                                                                                                                            | 90             | 90             | 105.615(6)                                                                                                                                                                       | 105.671(5)     | 105.613(7)     |
| $\beta$ , °                                                                                | 118.483(6)                                                                                                                                                    | 118.570(6)     | 118.711(5)     | 117.877(5)                                                                                                                                                                    | 117.062(6)     | 116.719(7)     | 102.221(5)                                                                                                                                                                       | 102.257(4)     | 102.473(6)     |
| $\gamma$ , °                                                                               | 90                                                                                                                                                            | 90             | 90             | 90                                                                                                                                                                            | 90             | 90             | 111.652(6)                                                                                                                                                                       | 111.727(6)     | 111.889(8)     |
| Volume, Å <sup>3</sup>                                                                     | 3912.8(3)                                                                                                                                                     | 3970.7(3)      | 4020.1(3)      | 4133.0(3)                                                                                                                                                                     | 4188.4(4)      | 4253.4(5)      | 2096.0(2)                                                                                                                                                                        | 2111.0(2)      | 2121.7(3)      |
| <i>Z</i> , $\rho_3$ (calc.), g/cm <sup>3</sup>                                             | 4, 1.403                                                                                                                                                      | 4, 1.383       | 4, 1.366       | 4, 1.524                                                                                                                                                                      | 4, 1.504       | 4, 1.481       | 1, 1.503                                                                                                                                                                         | 1, 1.492       | 1, 1.485       |
| $\mu$ , mm <sup>-1</sup>                                                                   | 0.398                                                                                                                                                         | 0.396          | 0.391          | 2.306                                                                                                                                                                         | 2.276          | 2.241          | 2.274                                                                                                                                                                            | 2.258          | 2.246          |
| <i>F</i> (000)                                                                             | 1720                                                                                                                                                          |                |                | 1928                                                                                                                                                                          |                |                | 964                                                                                                                                                                              |                |                |
| Crystal size, mm                                                                           | 0.45 x 0.2 x 0.15                                                                                                                                             |                |                | 0.35 x 0.2 x 0.15                                                                                                                                                             |                |                | 0.45 x 0.2 x 0.2                                                                                                                                                                 |                |                |
| $\theta$ range, °                                                                          | 2.93 – 29.07                                                                                                                                                  | 2.92 – 29.07   | 2.78 – 26.32   | 2.89 – 26.32                                                                                                                                                                  | 2.86 – 26.32   | 2.84 – 26.32   | 2.98 – 29.07                                                                                                                                                                     | 2.97 – 29.07   | 2.96 – 29.05   |
| Reflections collected                                                                      | 35119                                                                                                                                                         | 34504          | 29041          | 18730                                                                                                                                                                         | 18484          | 17664          | 18399                                                                                                                                                                            | 21030          | 17180          |
| Reflections unique [ <i>R</i> <sub>int</sub> ]                                             | 10460 [0.0432]                                                                                                                                                | 10602 [0.0441] | 8169 [0.0322]  | 8409 [0.0296]                                                                                                                                                                 | 8504 [0.0292]  | 8628 [0.0296]  | 14200 [0.0358]                                                                                                                                                                   | 14503 [0.0341] | 13019 [0.0338] |
| Completeness to $\theta$                                                                   | 0.999                                                                                                                                                         | 0.999          | 0.999          | 0.999                                                                                                                                                                         | 0.998          | 0.998          | 0.999                                                                                                                                                                            | 0.999          | 0.999          |
| Number of parameters                                                                       | 531                                                                                                                                                           | 531            | 526            | 531                                                                                                                                                                           | 520            | 531            | 1045                                                                                                                                                                             |                |                |
| Goodness-of-fit on <i>F</i> <sup>2</sup>                                                   | 1.002                                                                                                                                                         | 0.994          | 1.020          | 1.015                                                                                                                                                                         | 1.016          | 0.928          | 1.049                                                                                                                                                                            | 1.041          | 1.038          |
| Final <i>R</i> <sub>1</sub> , <i>wR</i> <sub>2</sub> [ <i>I</i> > 2 $\sigma$ ( <i>I</i> )] | 0.0395, 0.0808                                                                                                                                                | 0.0486, 0.0929 | 0.0427, 0.0870 | 0.0322, 0.0661                                                                                                                                                                | 0.0399, 0.0733 | 0.0479, 0.0623 | 0.0760, 0.1975                                                                                                                                                                   | 0.0789, 0.2163 | 0.0797, 0.2103 |
| <i>R</i> <sub>1</sub> , <i>wR</i> <sub>2</sub> (all data)                                  | 0.0645, 0.0872                                                                                                                                                | 0.0818, 0.1063 | 0.0640, 0.0955 | 0.0463, 0.0716                                                                                                                                                                | 0.0660, 0.0816 | 0.1006, 0.0799 | 0.0916, 0.2100                                                                                                                                                                   | 0.0988, 0.2329 | 0.1117, 0.2410 |
| $\Delta\rho_{\max}$ / $\Delta\rho_{\min}$ , e <sup>-</sup> Å <sup>-3</sup>                 | 0.412 / -0.687                                                                                                                                                | 0.539 / -0.516 | 0.472 / -0.447 | 0.429 / -0.391                                                                                                                                                                | 0.591 / -0.549 | 0.598 / -0.538 | 2.678 / -2.319                                                                                                                                                                   | 1.881 / -1.932 | 1.041 / -1.130 |
| CCDC code                                                                                  | 2162851                                                                                                                                                       | 2162852        | 2162853        | 2162854                                                                                                                                                                       | 2162855        | 2162856        | 2162857                                                                                                                                                                          | 2162858        | 2162859        |

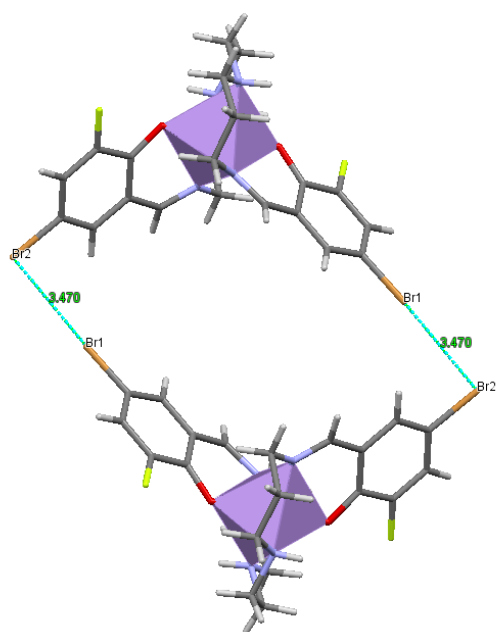

**Figure S3.** Br...Br contacts in dimers of cationic complexes in crystal structure of **2**.

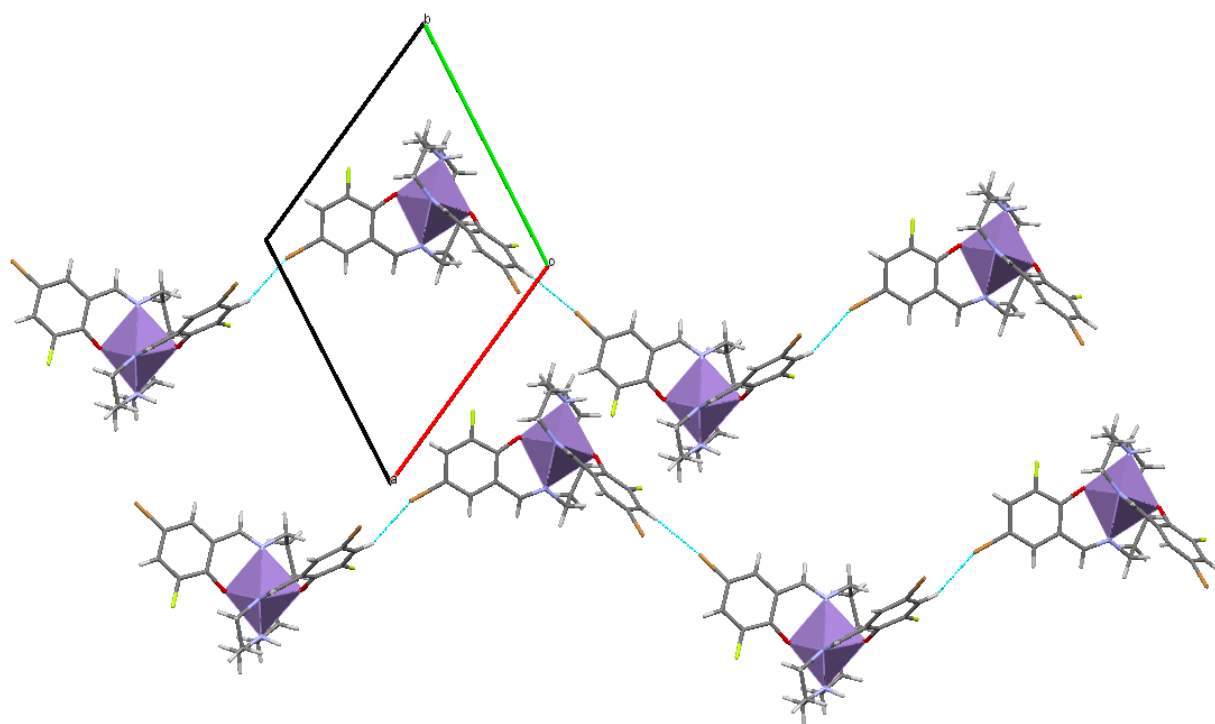

**Figure S4.** View of C-H...Br interactions (cyan lines) forming a 1D chains in **3**.

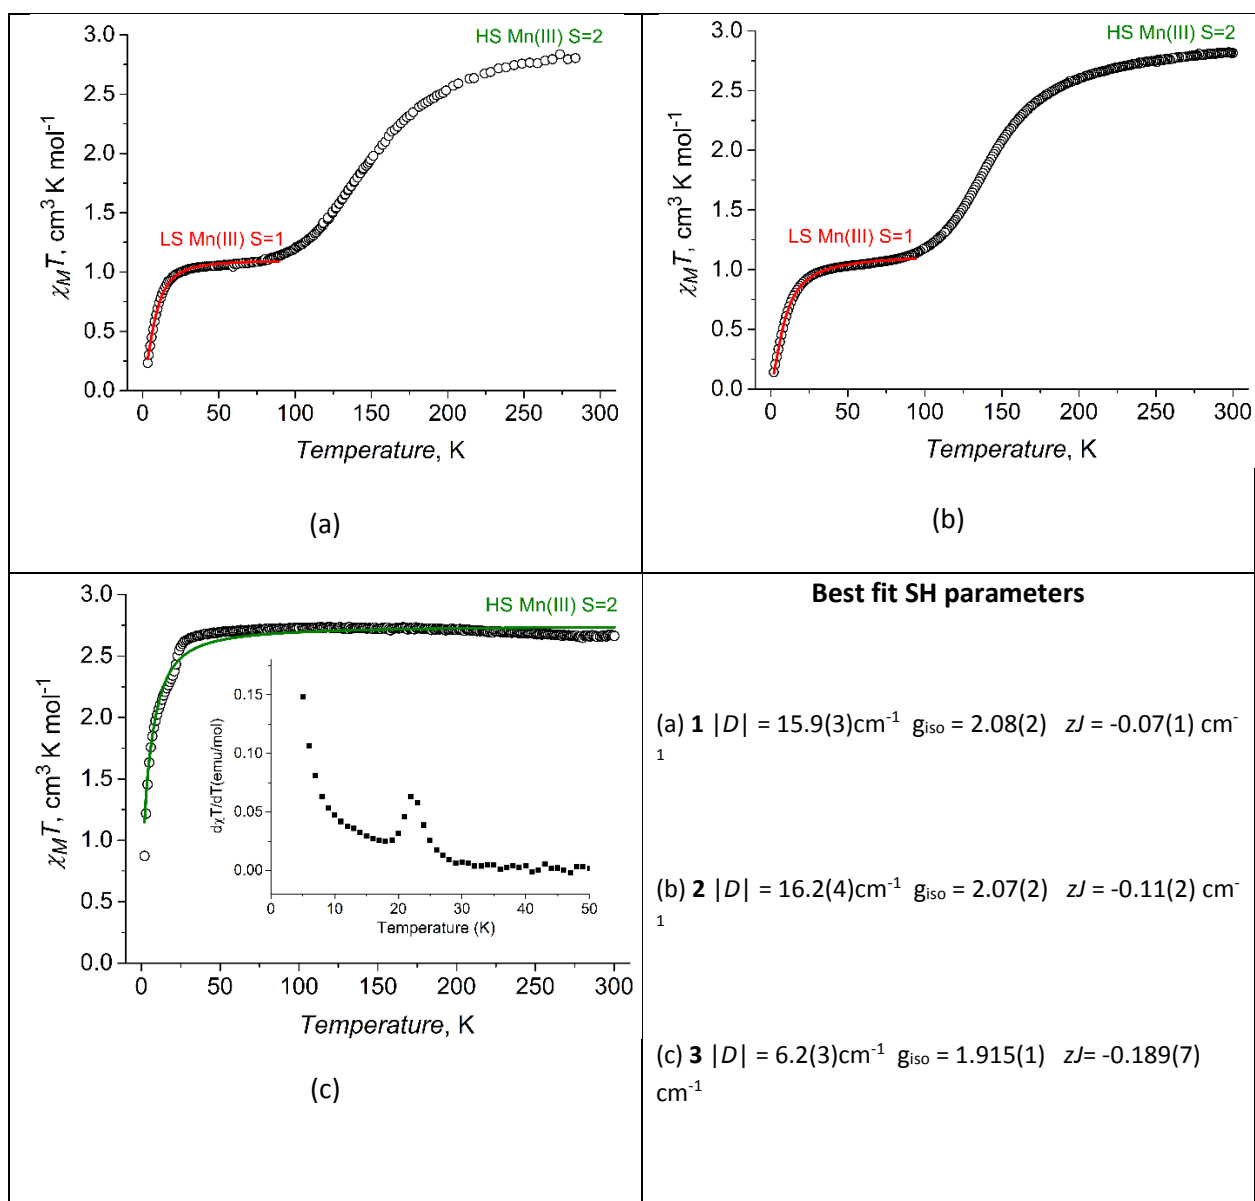

**Figure S5.** Temperature dependence of  $\chi_M T$  product for **1-3**. The empty circles – experimental data, solid lines – best fit data with corresponding parameters. Inset (c):  $d(\chi_M T)/dT$  vs.  $T$  for **3**. The magnetic data were fitted by the spin-Hamiltonian with corresponding parameters using *PHI* program [1].

### References

1. N. F. Chilton, R. P. Anderson, L. D. Turner, A. Soncini, K. S. Murray, *J. Comput. Chem.* 2013, 34, 1164–1175.
